# Supplementary material for: Diversity and distribution of the cladocerans (Crustacea, Branchiopoda) in Thailand
Source: Biodivers Data J. 2023 May 25;11:e103553. doi: 10.3897/BDJ.11.e103553 (PMC10236201; doi:10.3897/BDJ.11.e103553)
Supplement: Supplementary material 3 — Sorensen’s Similarity Index of cladoceran species amongst habitat types [file bdj-11-e103553-s003.xlsx]

## Sheet: Sheet1
Habitats	c	d	e	f	ff	l	m	mi	ml	p	po	ps	r	rc	re	rf	sf	st	sw	tp
wf	0.32	0.28	0	0.15	0	0.46	0.12	0.32	0.22	0.19	0.5	0.1	0.17	0.09	0.17	0.15	0.11	0.17	0.14	0.15
w	0	0.06	0	0.08	0	0.05	0.06	0.06	0.14	0.06	0.08	0.04	0.07	0.11	0.09	0.08	0.13	0.06	0.05	0.22
tp	0	0.05	0	0.11	0.13	0.1	0	0.11	0.21	0.12	0.06	0.03	0.13	0.26	0.12	0.22	0.1	0.17	0.07
sw	0.29	0.46	0.03	0.56	0.12	0.56	0.5	0.5	0.22	0.64	0.46	0.72	0.61	0.3	0.52	0.58	0.24	0.45
st	0.24	0.51	0	0.26	0.16	0.04	0.38	0.47	0.44	0.47	0.57	0.46	0.43	0.51	0.37	0.5	0.24
sf	0.23	0.28	0	0.27	0.1	0.22	0.21	0.27	0.32	0.22	0.32	0.3	0.24	0.2	0.33	0.3
rf	0.27	0.55	0	0.62	0.18	0.58	0.47	0.59	0.34	0.64	0.54	0.61	0.53	0.51	0.4
re	0.29	0.36	0	0.4	0.12	0.44	0.32	0.44	0.26	0.43	0.42	0.46	0.5	0.31
rc	0.21	0.22	0	0.29	0.17	0.24	0.28	0.47	0.3	0.21	0.32	0.35	0.29
r	0.3	0.57	0	0.48	0.06	0.58	0.52	0.54	0.21	0.61	0.49	0.57
ps	0.33	0.64	0	0.61	0.1	0.55	0.59	0.59	0.27	0.63	0.54
po	0.49	0.81	0	0.56	0	0.38	0.55	0.69	0.39	0.52
p	0.27	0.58	0	0.62	0.09	0.66	0.53	0.57	0.25
ml	0.4	0.38	0	0.27	0.2	0.17	0.26	0.37
mi	0.36	0.75	0	0.59	0	0.43	0.55
m	0.43	0.56	0	0.47	0.1	0.41
l	0.22	0.45	0	0.61	0.12
ff	0.1	0	0	0.11
f	0.23	0.55	0
e	0	0.12
d	0.42
